# Supplementary material for: Deep Eutectic Solvent-Based Ultrasound-Assisted Strategy for Simultaneous Extraction of Five Macamides from Lepidium meyenii Walp and In Vitro Bioactivities
Source: MDPI journal article supplement (doi:10.3390/foods12020248), 2023-01-05
Supplement: s1 [file s1]

Article

# Deep Eutectic Solvent-Based Ultrasound-Assisted Strategy for Simultaneous Extraction of Five Macamides from *Lepidium meyenii* Walp and In Vitro Bioactivities

Keke Li <sup>1</sup>, Zhongyu Li <sup>1</sup>, Lei Men <sup>1</sup>, Jiwen Li <sup>1,2</sup> and Xiaojie Gong <sup>1,2,\*</sup>

<sup>1</sup> College of Life Sciences, Key Laboratory of Biotechnology and Bioresources Utilization, Dalian Minzu University, Ministry of Education, Dalian 116600, China

<sup>2</sup> School of Biological Engineering, Dalian Polytechnic University, Dalian 116034, China

\* Correspondence: gxjclr@163.com; Tel.: +86-411-87656057

**Supplementary Information**

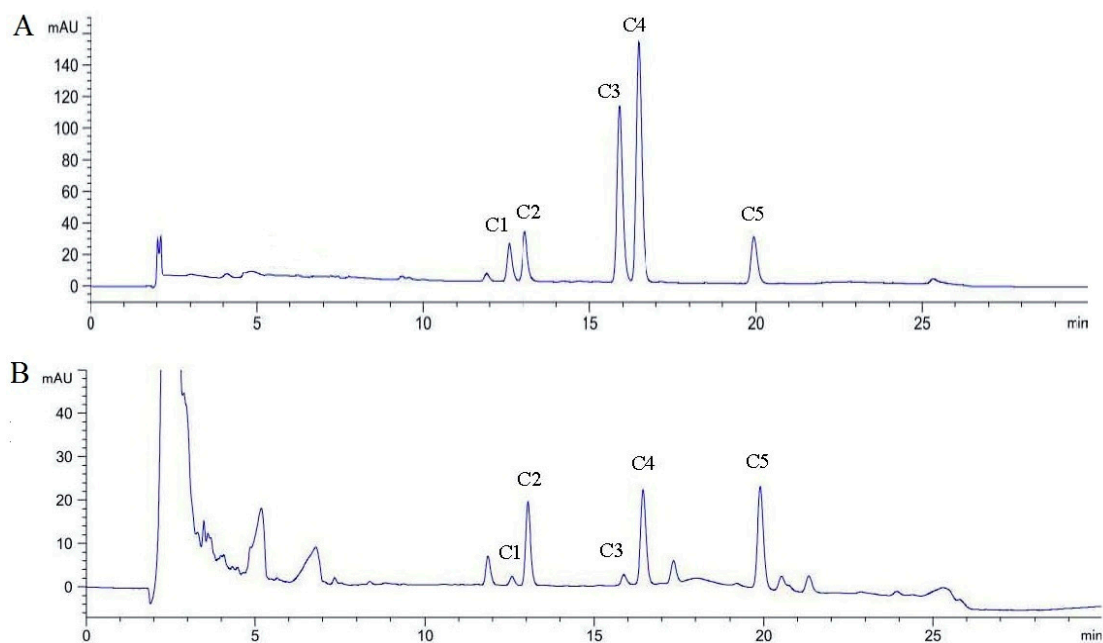

**Figure S1.** Representative HPLC-UV chromatographic profiles of standards mixture (A) and extract by DES-7 with 20% water content (B).

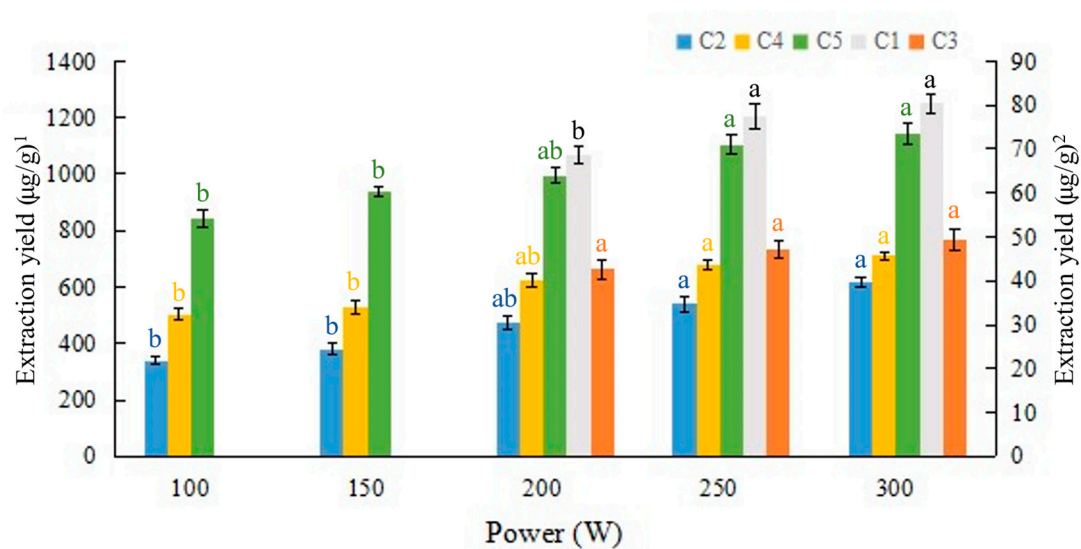

**Figure S2.** Effect of ultrasound power on the yields of five target macamides. Different lowercase in the same color of column represent the significant difference at  $p < 0.05$ . (<sup>1</sup> Extraction yields of C2, C4 and C5; <sup>2</sup> Extraction yields of C1 and C3).

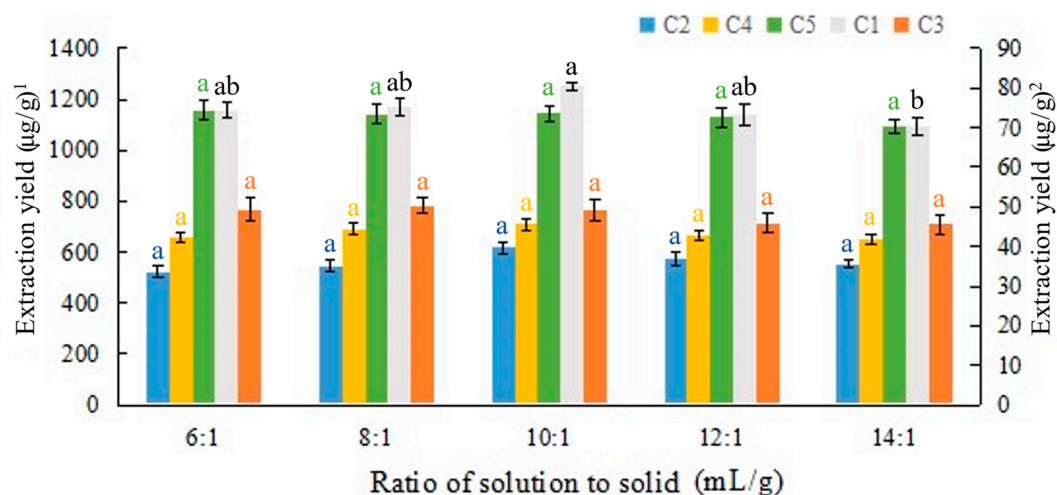

**Figure S3.** Effect of ratio of solution to solid on the yields of five target macamides. Different lowercase in the same color of column represent the significant difference at  $p < 0.05$ . (<sup>1</sup> Extraction yields of C2, C4 and C5; <sup>2</sup> Extraction yields of C1 and C3).

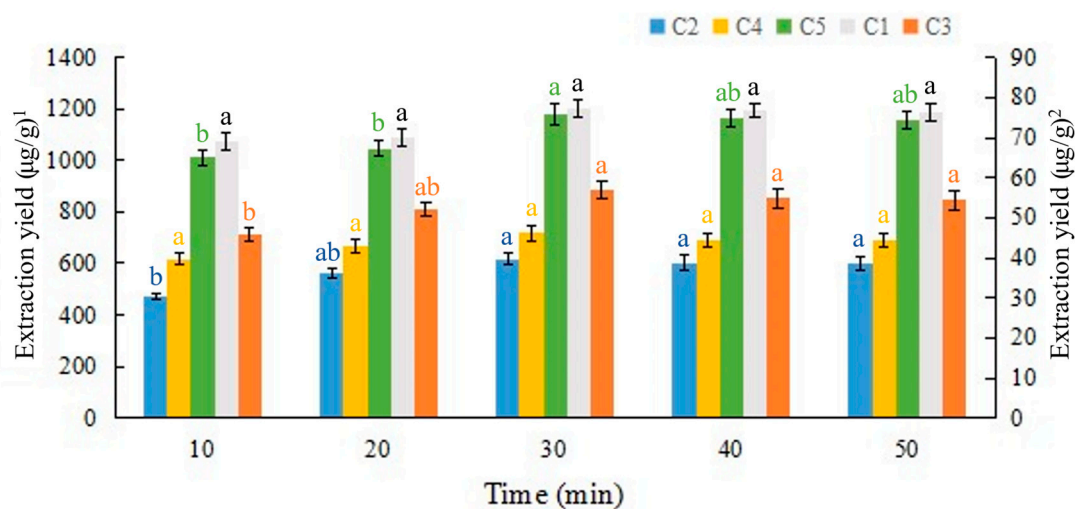

**Figure S4.** Effect of extraction time on the yields of five target macamides. Different lowercase in the same color of column represent the significant difference at  $p < 0.05$ . (<sup>1</sup> Extraction yields of C2, C4 and C5; <sup>2</sup> Extraction yields of C1 and C3).

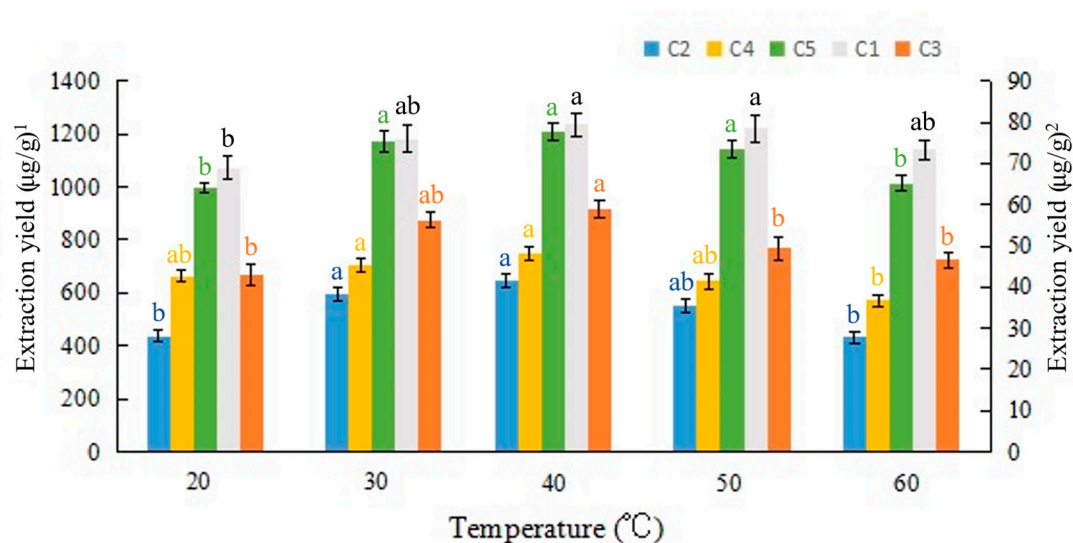

**Figure S5.** Effect of extraction temperature on the yields of five target macamides. Different lowercase in the same color of column represent the significant difference at  $p < 0.05$ . (<sup>1</sup> Extraction yields of C2, C4 and C5; <sup>2</sup> Extraction yields of C1 and C3).

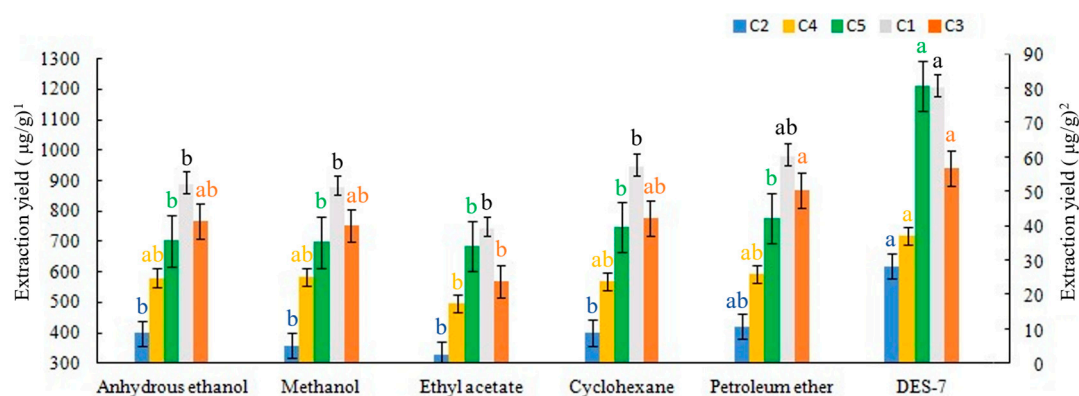

**Figure S6.** Comparison of the extraction efficiency between DES and conventional organic solvents by UAE. Different lowercase in the same color of column represent the significant difference at  $p < 0.05$ . (<sup>1</sup> Extraction yields of C2, C4 and C5; <sup>2</sup> Extraction yields of C1 and C3).

1 **Table S1** Linear regression, LODs, LOQs, precisions, stability and repeatability of the four analytes by HPLC-DAD.

2

| Analyte<br>s | Regression equations    | R <sup>2</sup> | Linear ranges<br>(µg/mL) | LODs<br>(ng) | LOQs<br>(ng) | Intra-day precision<br>(n = 6, RSD%) | Inter-day<br>precision<br>(n = 3, RSD%) | Stability<br>(n = 3,<br>RSD%) | Repeatability<br>(n = 6,<br>RSD%) |
|--------------|-------------------------|----------------|--------------------------|--------------|--------------|--------------------------------------|-----------------------------------------|-------------------------------|-----------------------------------|
| C1           | Y = 14.490X - 0.4902    | 0.9993         | 1.30—82.57               | 2.57         | 7.79         | 2.41                                 | 1.86                                    | 1.36                          | 1.64                              |
| C2           | Y = 20.290X +<br>78.308 | 0.9994         | 3.52-600.00              | 1.46         | 4.38         | 3.83                                 | 3.98                                    | 4.48                          | 1.92                              |
| C3           | Y = 19.989X +<br>11.205 | 0.9999         | 0.84-200.00              | 2.06         | 6.37         | 1.79                                 | 2.66                                    | 3.12                          | 1.58                              |
| C4           | Y = 18.460X - 16.961    | 0.9992         | 8.00-2000.00             | 1.64         | 4.96         | 3.55                                 | 4.77                                    | 4.58                          | 1.71                              |
| C5           | Y = 13.045X - 23.197    | 0.9996         | 4.00-2000.00             | 2.82         | 8.56         | 3.68                                 | 3.79                                    | 3.22                          | 2.05                              |

**Table S2** The optimal conditions by DESs-UAE for the five macamides.

| Term          | C1    | C2     | C3    | C4     | C5      |
|---------------|-------|--------|-------|--------|---------|
| $X_1$ (mL/g)  | 9.60  | 9.32   | 9.40  | 9.64   | 9.44    |
| $X_2$ (°C )   | 38.6  | 38.5   | 38.3  | 38.6   | 37.7    |
| $X_3$ (min)   | 28.7  | 25.8   | 27.2  | 26.8   | 27.2    |
| Yields (µg/g) |       |        |       |        |         |
| Predicted     | 79.57 | 617.92 | 57.32 | 714.45 | 1226.81 |
| Observed      | 79.27 | 608.53 | 56.67 | 708.61 | 1212.89 |
| $\delta$ (%)  | 0.38  | 1.54   | 1.15  | 0.82   | 1.15    |
